# Supplementary material
Source: PubMed Central journal article supplement (PMC7893232)
Supplement: rspb20202480supp1.pdf [file rspb20202480supp1.pdf]

Supplementary materials for Park G, Dam HG. 2021. Cell growth gene expression reveals a direct fitness cost of grazer-induced toxin production in red tide dinoflagellate prey. Proc. R. Soc. B 20202480.

<https://doi.org/10.1098/rspb.2020.2480>

Appendix S1A.

Details of qPCR primers used in this study. The primers sxt007F and sxt008R were used to generate PCR product of *sxtA* fragment.

| Function  | Gene        | Name         | Sequence 5' – 3'        | Length | Reference   |
|-----------|-------------|--------------|-------------------------|--------|-------------|
| Toxin     | <i>sxtA</i> | sxt007F      | ATGCTCAACATGGGAGTCATCC  | 750 bp | Stüken 2011 |
|           |             | sxt008R      | GGGTCCAGTAGATGTTGACGATG |        | Stüken 2011 |
|           | <i>sxtA</i> | sxtA4F       | CTGAGCAAGGCGTTCAATTC    | 125 bp | Murray 2011 |
|           |             | sxtA4R       | TACAGATMGGCCCTGTGARC    |        | Murray 2011 |
|           | <i>sxtG</i> | 559F         | GACGGGAACGGCTACAA       | 65 bp  | Orr 2013    |
|           |             | 605R         | GCTCGAAGATCGGGTCCT      |        | Orr 2013    |
| Growth    | <i>cyc</i>  | AlexcyclinF1 | CCAGGCTCAGCGGCTACGT     | 128 bp | Zhuang 2013 |
|           |             | AlexcyclinR1 | AGCATCTCCGTGTGGCGATACT  |        | Zhuang 2013 |
| Reference | <i>lbp</i>  | AlexLBPNF    | GCGTGACATGAGCGGCTACAT   | 207 bp | Zhuang 2013 |
|           |             | AlexLBPNR1   | TTGGAGCGGCGGCAGAACAT    |        | Zhuang 2013 |
|           | <i>cob</i>  | cobF         | TCCCATTTTTCCCTTTCWTT    | 212 bp | Wiese 2014  |
|           |             | cobR         | ATTTTTGTTGGGCACAGCTT    |        | Wiese 2014  |

Appendix S1B.

qPCR efficiency ( $10^{(-1/\text{slope})}$ ),  $R^2$  (coefficient of determination of the regression), and melting temperature ( $T_m$ : °C) of *Alexandrium catenella* strain BF-5.

| Strain | Function  | Gene         | qPCR efficiency | $R^2$ | $T_m$     |
|--------|-----------|--------------|-----------------|-------|-----------|
| BF-5   | Toxin     | <i>sxtA4</i> | 1.974           | 0.997 | 81.2±0.20 |
|        | Toxin     | <i>sxtG</i>  | 1.976           | 0.991 | 77.7±0.19 |
|        | Growth    | <i>cyc</i>   | 1.705           | 0.999 | 85.2±0.30 |
|        | Reference | <i>lbp</i>   | 1.850           | 0.999 | 82.3±0.17 |
|        | Reference | <i>cob</i>   | 1.874           | 0.999 | 82.5±0.16 |

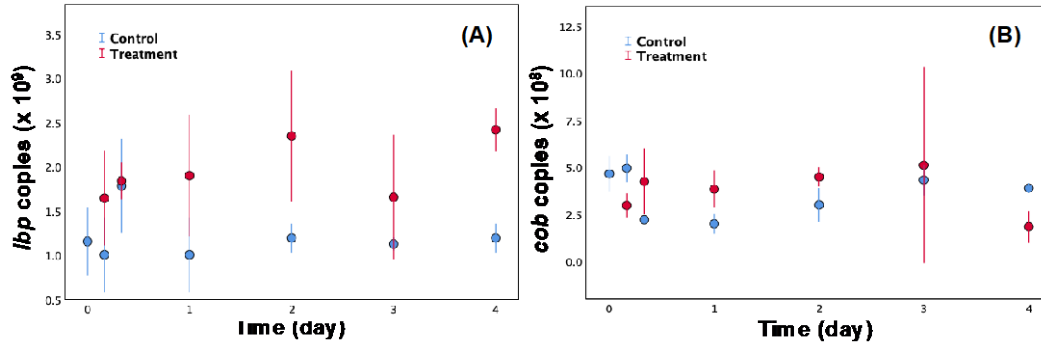

Appendix S1C. Gene expression of reference genes (A) *lbp* (luciferin-binding protein) and (B) *cob* (cytochrome b) in the control and treatment. Error bars represent  $\pm 1$  standard deviation of the mean. The expression level of *lbp* was more stable with the maximum fold-change of 1.77 in the control and 1.47 in the treatment, compared to that of *cob* (2.49-fold and 2.78-fold, respectively). Hence, the *lbp* gene was chosen to normalize the gene expression levels in the control (ANOVA,  $p > 0.07$ ) and treatment (ANOVA,  $p > 0.259$ ).

Appendix S2. Summary of two-way ANOVA for dependent variables: cell concentration, toxin content, net growth rate, toxin composition, and relative gene expression during the grazing assay. Factors in the ANOVA are absence or presence of grazer *Acartia hudsonica*, time (seven levels; 0, 4, 8, 24, 48, 72, and 96 hr), and the interaction of treatment and time. SS(III), type III sum of squares; df, degrees of freedom; MS, mean sum of squares for ANOVA;  $F$ , statistic for ANOVA test;  $p$ , significance of the ANOVA test;  $\eta^2$ , partial eta squared.

| Cell Concentration (cells ml <sup>-1</sup> )  |         |    |             |       |       |          |
|-----------------------------------------------|---------|----|-------------|-------|-------|----------|
| Source                                        | SS(III) | Df | Mean Square | $F$   | $p$   | $\eta^2$ |
| Day                                           | 709     | 6  | 118         | 2.97  | 0.017 | 0.30     |
| Treatment                                     | 8257    | 1  | 8257        | 207   | 0.001 | 0.83     |
| Day $\times$ Treat.                           | 3905    | 6  | 651         | 16.3  | 0.001 | 0.70     |
| Residual                                      | 1674    | 42 | 40          |       |       |          |
| Total                                         | 60032   | 56 |             |       |       |          |
| Cell Toxin Content (fmol cell <sup>-1</sup> ) |         |    |             |       |       |          |
| Source                                        | SS(III) | Df | Mean Square | $F$   | $p$   | $\eta^2$ |
| Day                                           | 610     | 6  | 102         | 4.09  | 0.014 | 0.64     |
| Treatment                                     | 700     | 1  | 700         | 28.2  | 0.001 | 0.67     |
| Day $\times$ Treat.                           | 169     | 6  | 28          | 1.13  | 0.395 | 0.33     |
| Residual                                      | 348     | 14 | 25          |       |       |          |
| Total                                         | 7713    | 28 |             |       |       |          |
| Net Growth Rate (d <sup>-1</sup> )            |         |    |             |       |       |          |
| Source                                        | SS(III) | Df | Mean Square | $F$   | $p$   | $\eta^2$ |
| Day                                           | 0.373   | 5  | 0.075       | 5.61  | 0.001 | 0.44     |
| Treatment                                     | 0.358   | 1  | 0.358       | 26.9  | 0.001 | 0.43     |
| Day $\times$ Treat.                           | 0.011   | 5  | 0.002       | 0.169 | 0.972 | 0.02     |
| Residual                                      | 0.479   | 36 | 0.013       |       |       |          |
| Total                                         | 1.368   | 48 |             |       |       |          |

## Appendix S2. Continued

| GTX3                |         |    |             |          |          |          |
|---------------------|---------|----|-------------|----------|----------|----------|
| Source              | SS(III) | df | Mean Square | <i>F</i> | <i>p</i> | $\eta^2$ |
| Day                 | 919     | 6  | 153         | 9.66     | 0.001    | 0.81     |
| Treatment           | 532     | 1  | 532         | 33.5     | 0.001    | 0.71     |
| Day $\times$ Treat. | 153     | 6  | 26          | 1.61     | 0.216    | 0.41     |
| Residual            | 222     | 14 | 16          |          |          |          |
| Total               | 7713    | 28 |             |          |          |          |
| GTX4                |         |    |             |          |          |          |
| Source              | SS(III) | df | Mean Square | <i>F</i> | <i>p</i> | $\eta^2$ |
| Day                 | 518     | 6  | 86          | 1.79     | 0.172    | 0.44     |
| Treatment           | 386     | 1  | 386         | 8.04     | 0.013    | 0.37     |
| Day $\times$ Treat. | 249     | 6  | 42          | 0.86     | 0.544    | 0.27     |
| Residual            | 673     | 14 | 48          |          |          |          |
| Total               | 7713    | 28 |             |          |          |          |
| NEO                 |         |    |             |          |          |          |
| Source              | SS(III) | df | Mean Square | <i>F</i> | <i>p</i> | $\eta^2$ |
| Day                 | 672     | 6  | 112         | 8.71     | 0.001    | 0.79     |
| Treatment           | 782     | 1  | 782         | 60.8     | 0.001    | 0.81     |
| Day $\times$ Treat. | 192     | 6  | 32          | 2.49     | 0.075    | 0.52     |
| Residual            | 180     | 14 | 13          |          |          |          |
| Total               | 7713    | 28 |             |          |          |          |
| STX                 |         |    |             |          |          |          |
| Source              | SS(III) | df | Mean Square | <i>F</i> | <i>p</i> | $\eta^2$ |
| Day                 | 356     | 6  | 59          | 415      | 0.001    | 0.99     |
| Treatment           | 448     | 1  | 448         | 3136     | 0.001    | 1.00     |
| Day $\times$ Treat. | 356     | 6  | 59          | 415      | 0.001    | 0.99     |
| Residual            | 2       | 14 | 0.14        |          |          |          |
| Total               | 7049    | 28 |             |          |          |          |
| C2                  |         |    |             |          |          |          |
| Source              | SS(III) | df | Mean Square | <i>F</i> | <i>p</i> | $\eta^2$ |
| Day                 | 340     | 6  | 57          | 0.644    | 0.695    | 0.22     |
| Treatment           | 137     | 1  | 137         | 1.56     | 0.232    | 0.10     |
| Day $\times$ Treat. | 118     | 6  | 20          | 0.224    | 0.962    | 0.09     |
| Residual            | 1231    | 14 | 88          |          |          |          |
| Total               | 7713    | 28 |             |          |          |          |

## Appendix S2. Continued

| <i>sxtA4</i>        |         |    |             |          |          |          |
|---------------------|---------|----|-------------|----------|----------|----------|
| Source              | SS(III) | df | Mean Square | <i>F</i> | <i>p</i> | $\eta^2$ |
| Day                 | 2045    | 5  | 409         | 4.91     | 0.002    | 0.41     |
| Treatment           | 3040    | 1  | 3040        | 36.5     | 0.001    | 0.50     |
| Day $\times$ Treat. | 1127    | 5  | 225         | 2.70     | 0.036    | 0.27     |
| Residual            | 3000    | 36 | 83          |          |          |          |
| Total               | 38024   | 48 |             |          |          |          |
| <i>sxtG</i>         |         |    |             |          |          |          |
| Source              | SS(III) | df | Mean Square | <i>F</i> | <i>p</i> | $\eta^2$ |
| Day                 | 2041    | 5  | 408         | 11.4     | 0.001    | 0.61     |
| Treatment           | 4760    | 1  | 4760        | 133      | 0.001    | 0.79     |
| Day $\times$ Treat. | 1123    | 5  | 225         | 6.27     | 0.001    | 0.47     |
| Residual            | 1289    | 36 | 36          |          |          |          |
| Total               | 38024   | 48 |             |          |          |          |
| <i>cyc</i>          |         |    |             |          |          |          |
| Source              | SS(III) | df | Mean Square | <i>F</i> | <i>p</i> | $\eta^2$ |
| Day                 | 4357    | 5  | 871         | 13.1     | 0.001    | 0.65     |
| Treatment           | 2241    | 1  | 2241        | 33.7     | 0.001    | 0.48     |
| Day $\times$ Treat. | 221     | 5  | 44          | 0.665    | 0.652    | 0.09     |
| Residual            | 2393    | 36 | 66          |          |          |          |
| Total               | 38024   | 48 |             |          |          |          |

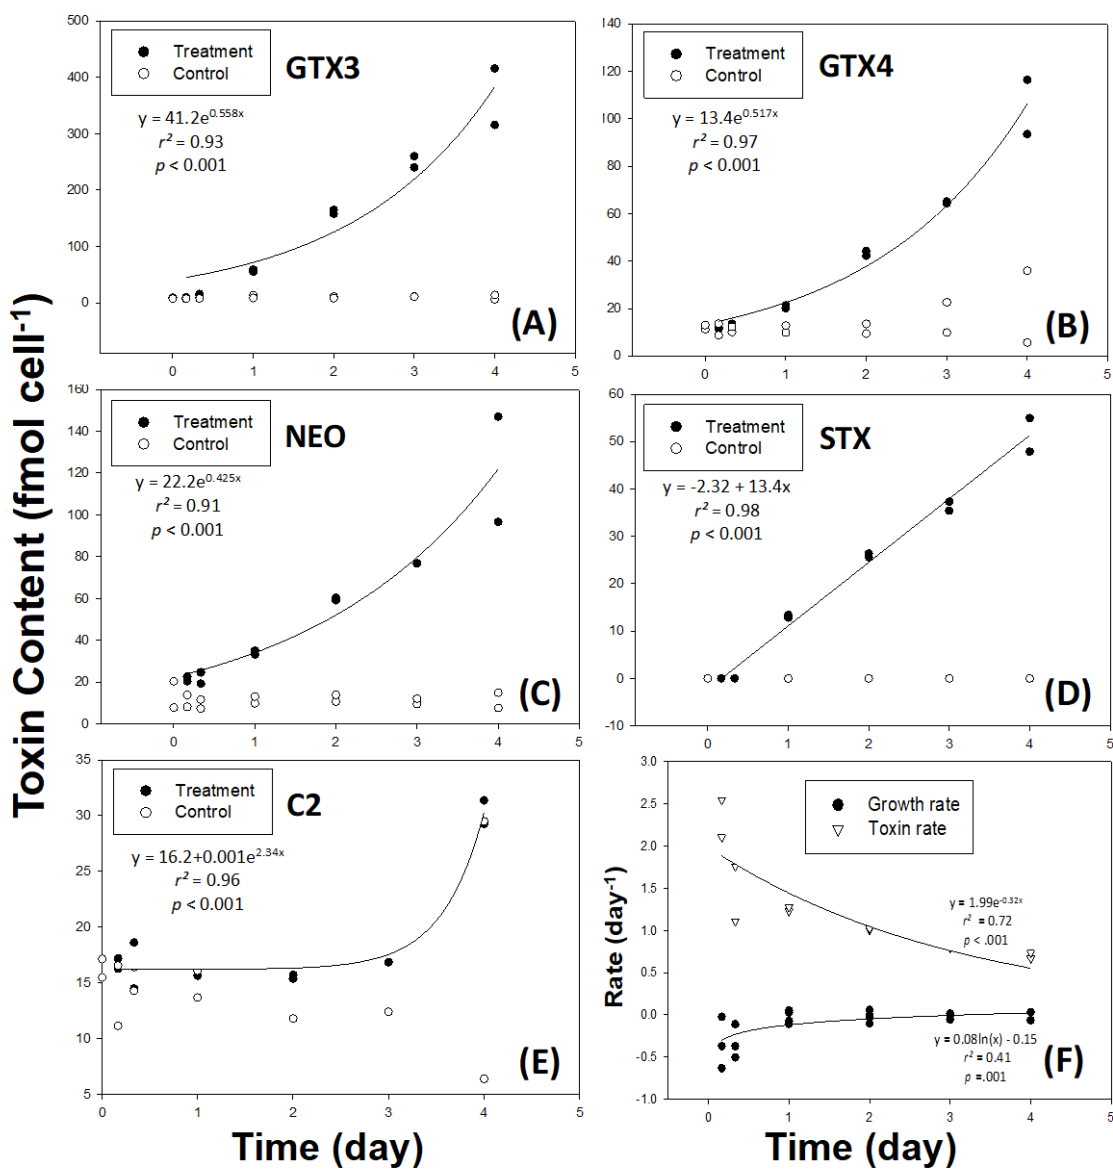

Appendix S3. Toxin profiles (A-E) of *Alexandrium catenella* in controls and treatments. Daily toxin production and growth rates in the treatments (F). Data in (F) are derived from the data shown in Figs. 1 C and 1D in the manuscript. Lines are regression fits.

Appendix S4. Calculation of defense fitness cost, grazing rate ( $g$ ), mean cell concentration ( $Cm$ ), and ingestion rate ( $I$ ) calculated from Frost's equations and this study ( $g'$ ,  $Cm'$ , and  $I'$ ) during the experiment.

Units of all terms are given in the text.

|                                           | Time (d)            | 0.17      | 0.33      | 1         | 2         | 3         | 4         |
|-------------------------------------------|---------------------|-----------|-----------|-----------|-----------|-----------|-----------|
| $Cell_{control}$                          | Mean                | 248       | 244       | 265       | 298       | 318       | 394       |
|                                           | SD                  | 6         | 11        | 28        | 44        | 13        | 51        |
| $Cell_{treatment}$                        | Mean                | 240       | 226       | 222       | 217       | 214       | 210       |
|                                           | SD                  | 12        | 6         | 12        | 15        | 6         | 12        |
| $\mu_{control}$                           | Mean                | -0.062    | -0.078    | 0.054     | 0.083     | 0.079     | 0.112     |
|                                           | SD                  | 0.157     | 0.134     | 0.108     | 0.070     | 0.014     | 0.034     |
| $\mu_{treatment}$                         | Mean                | -0.264    | -0.301    | -0.118    | -0.070    | -0.052    | -0.044    |
|                                           | SD                  | 0.297     | 0.083     | 0.054     | 0.033     | 0.010     | 0.014     |
| RGE $cyc_{control}$                       | Mean                | 0.362     | 0.824     | 0.954     | 0.948     | 0.673     | 0.691     |
|                                           | SD                  | 0.204     | 0.380     | 0.187     | 0.194     | 0.231     | 0.206     |
| RGE $cyc_{treatment}$                     | Mean                | 0.300     | 0.567     | 0.603     | 0.625     | 0.437     | 0.416     |
|                                           | SD                  | 0.053     | 0.059     | 0.102     | 0.118     | 0.056     | 0.017     |
| $\Delta\mu$                               | Eq. 4               | 0.202     | 0.222     | 0.172     | 0.154     | 0.132     | 0.156     |
| Cost proportion                           |                     | 0.171     | 0.312     | 0.368     | 0.340     | 0.351     | 0.398     |
| $Fitness\ cost$                           | Eq. 7               | 0.035     | 0.069     | 0.063     | 0.052     | 0.046     | 0.062     |
| $G$                                       | Frost (1972)        | 0.202     | 0.222     | 0.172     | 0.154     | 0.132     | 0.156     |
| $g'$                                      | Eq. 6               | 0.167     | 0.153     | 0.108     | 0.101     | 0.086     | 0.094     |
| <b><math>g'</math> vs. <math>g</math></b> | <b>% difference</b> | <b>17</b> | <b>31</b> | <b>37</b> | <b>34</b> | <b>35</b> | <b>40</b> |
| $Cm$                                      | Frost (1972)        | 245       | 238       | 236       | 233       | 231       | 229       |
| $Cm'$                                     | Eq. 9               | 245       | 241       | 243       | 246       | 248       | 259       |
| $I$                                       | Frost (1972)        | 1218      | 1325      | 1018      | 900       | 763       | 894       |
| $I'$                                      | Eq. 8               | 1009      | 923       | 666       | 627       | 530       | 609       |
| <b><math>I'</math> vs. <math>I</math></b> | <b>% difference</b> | <b>17</b> | <b>30</b> | <b>35</b> | <b>30</b> | <b>30</b> | <b>32</b> |
